# Supplementary material for: Nanomolar simultaneous determination of epinephrine and acetaminophen on a glassy carbon electrode coated with a novel Mg–Al layered double hydroxide–nickel hydroxide nanoparticles–multi-walled carbon nanotubes composite
Source: Royal Society of Chemistry journal article supplement (doi:10.1039/c4ay02406k), 2015-01-01
Supplement: c4ay02406k1.pdf [file c4ay02406k1.pdf]

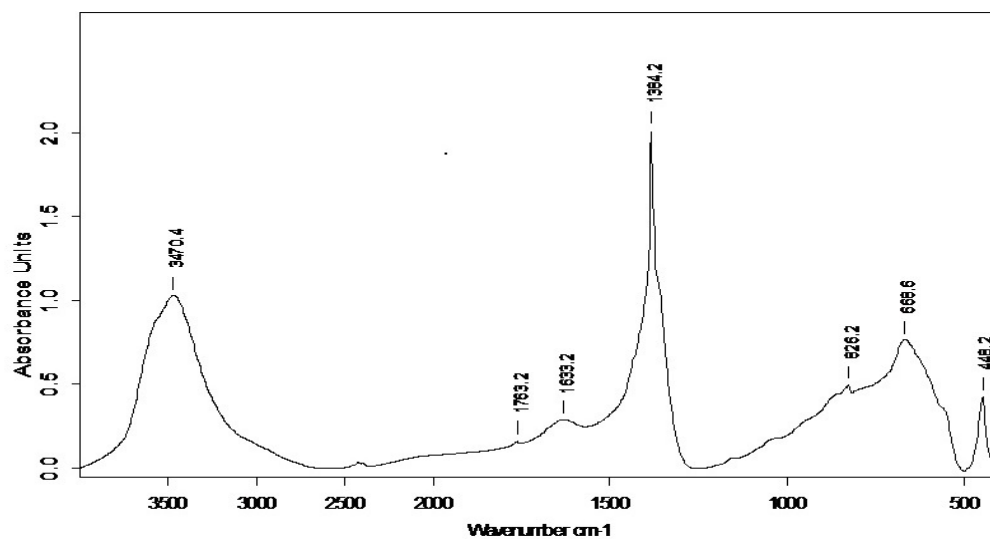

Fig. S1. FTIR spectrum of LDH

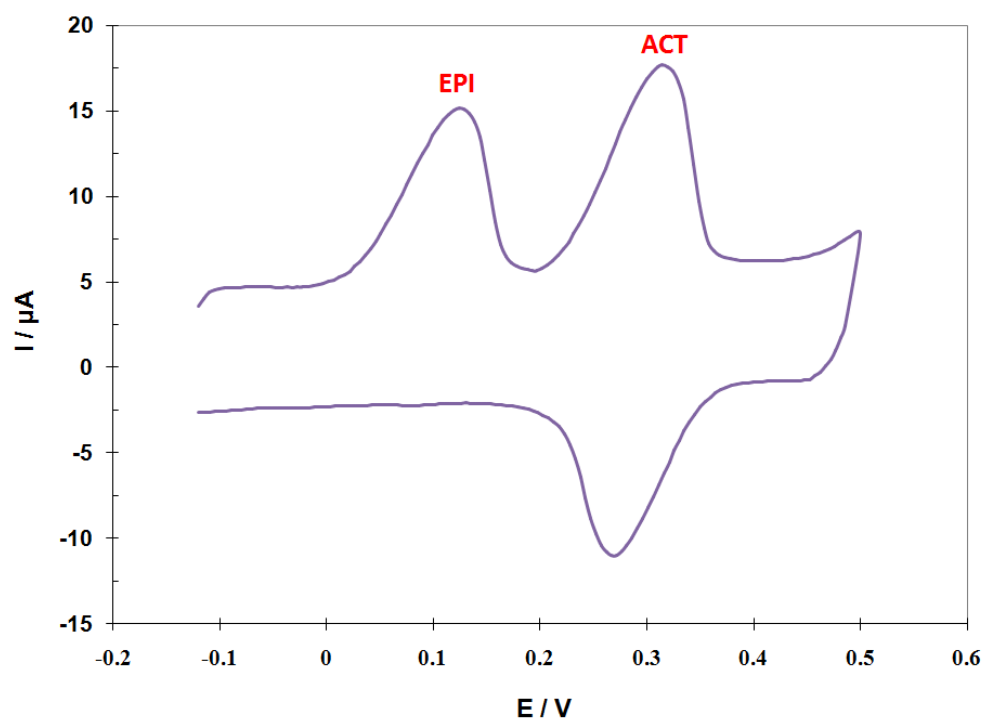

**Fig. S2.** Cyclic voltammogram of simultaneous determination of 5  $\mu\text{M}$  EPI and 5  $\mu\text{M}$  ACT at MWCNTs-NHNPs-LDH/GCE in 0.1 mol L<sup>-1</sup> phosphate buffer solution (pH=7) at scan rate of 50 mVs<sup>-1</sup>.

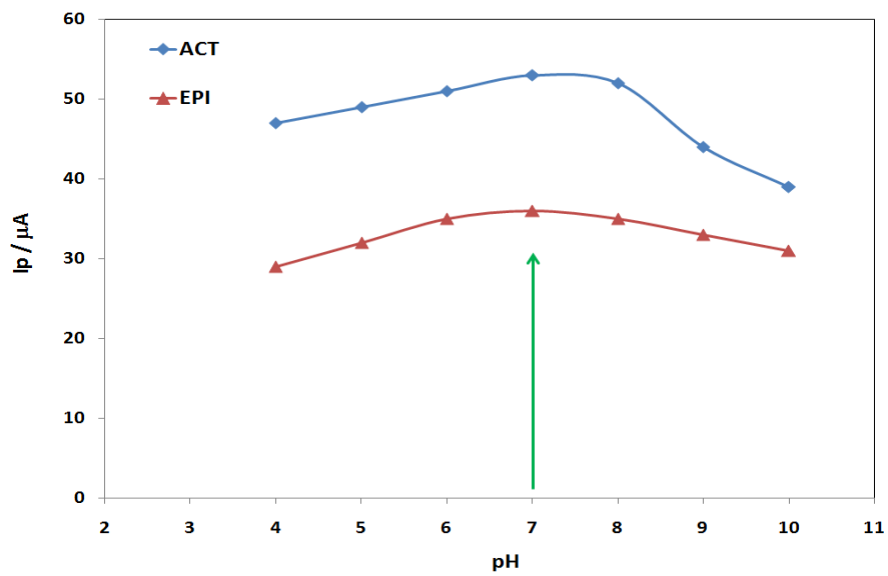

**Fig. S3.** Plot of anodic peak currents ( $I_{pa}$ ) as a function of pH of buffer solutions for 20  $\mu\text{M}$  EPI and 20  $\mu\text{M}$  ACT compounds at MWCNTs-NHNPs-LDH/GCE in 0.1M phosphate buffer.

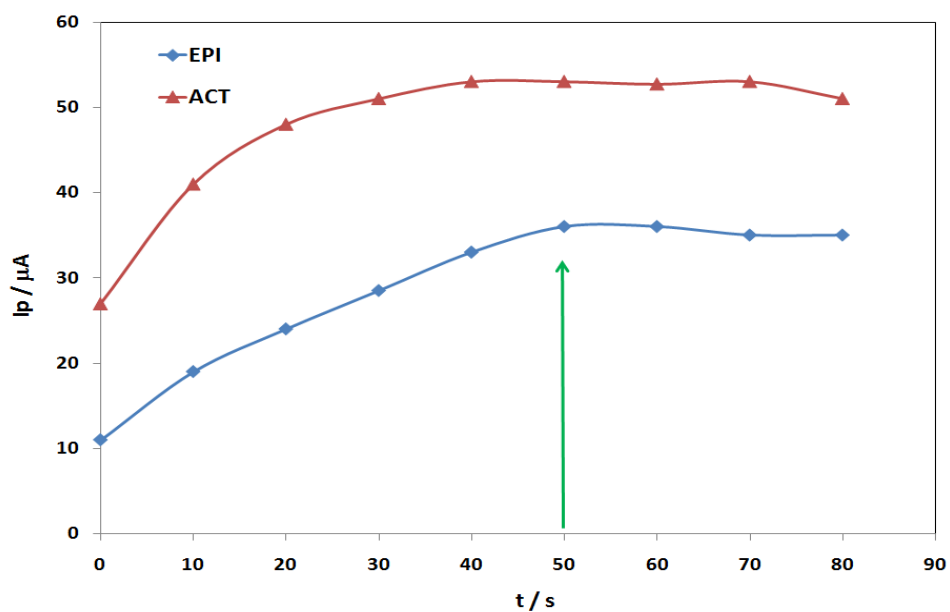

**Fig. S4.** Plot of anodic peak currents ( $I_p$ ) as a function of accumulation time for 20  $\mu\text{M}$  EPI and 20  $\mu\text{M}$  ACT compounds at MWCNTs-NHNPs-LDH/GCE in 0.1M phosphate buffer.

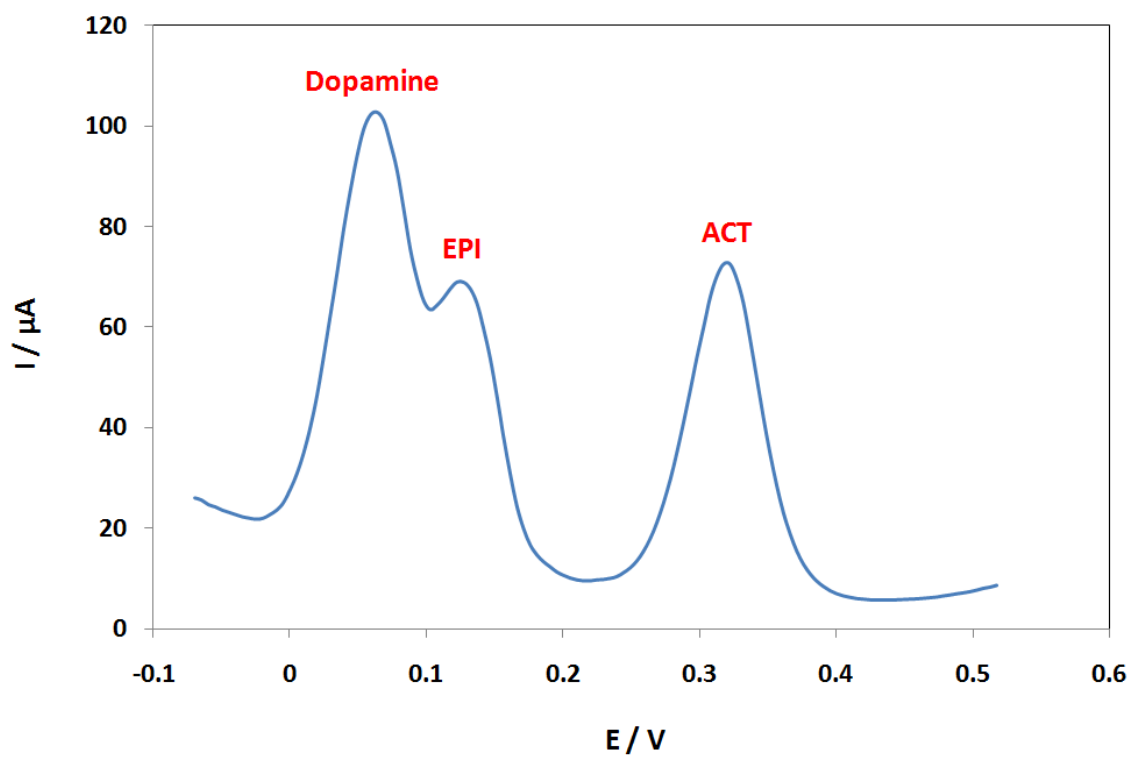

**Fig. S5.** Differential pulse voltammogram of 40  $\mu\text{M}$  EPI and 30  $\mu\text{M}$  ACT at MWCNTs-NHNPs-LDH/GCE in present of 200  $\mu\text{M}$  Dopamine.

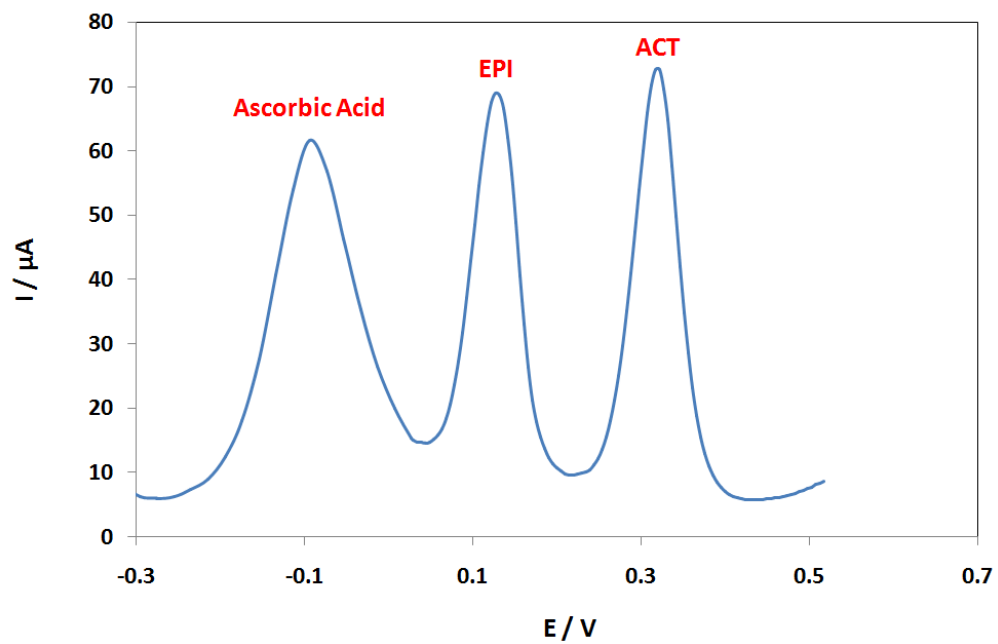

**Fig. S6.** Differential pulse voltammogram of 40  $\mu\text{M}$  EPI and 30  $\mu\text{M}$  ACT at MWCNTs-NHNPs-LDH/GCE in present of 350  $\mu\text{M}$  ascorbic acid.

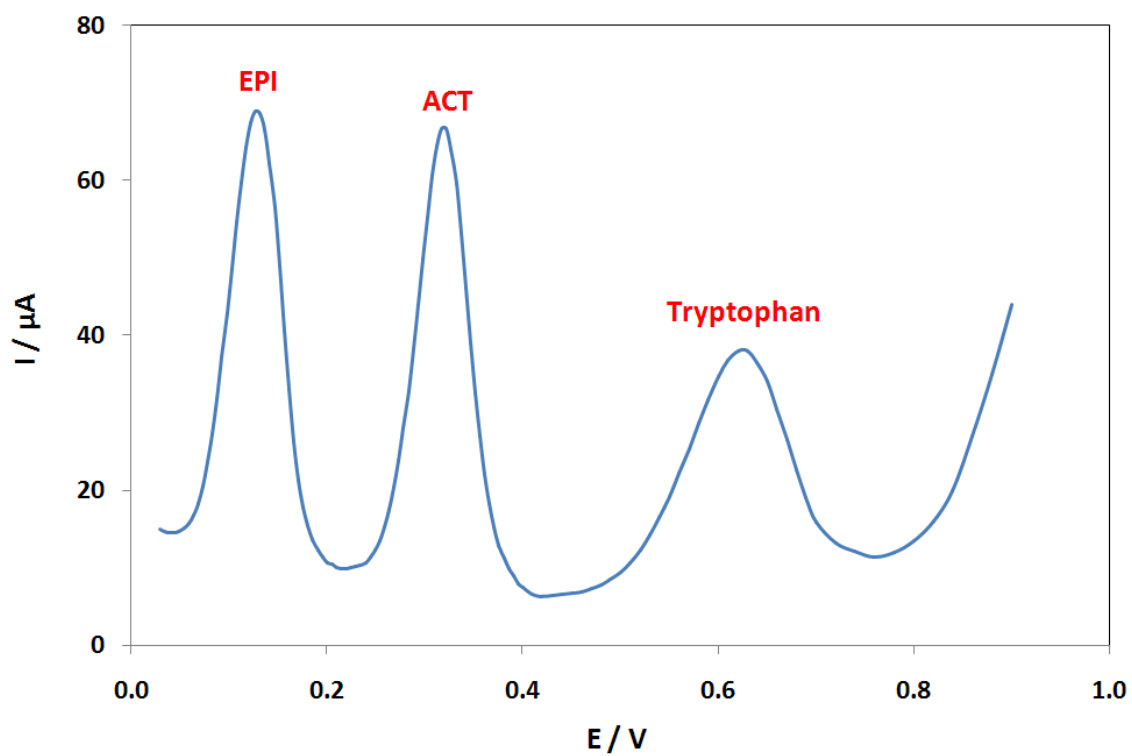

**Fig. S7.** Differential pulse voltammogram of 40  $\mu\text{M}$  EPI and 30  $\mu\text{M}$  ACT at MWCNTs-NHNPs-LDH/GCE in present of 250  $\mu\text{M}$  Tryptophan.

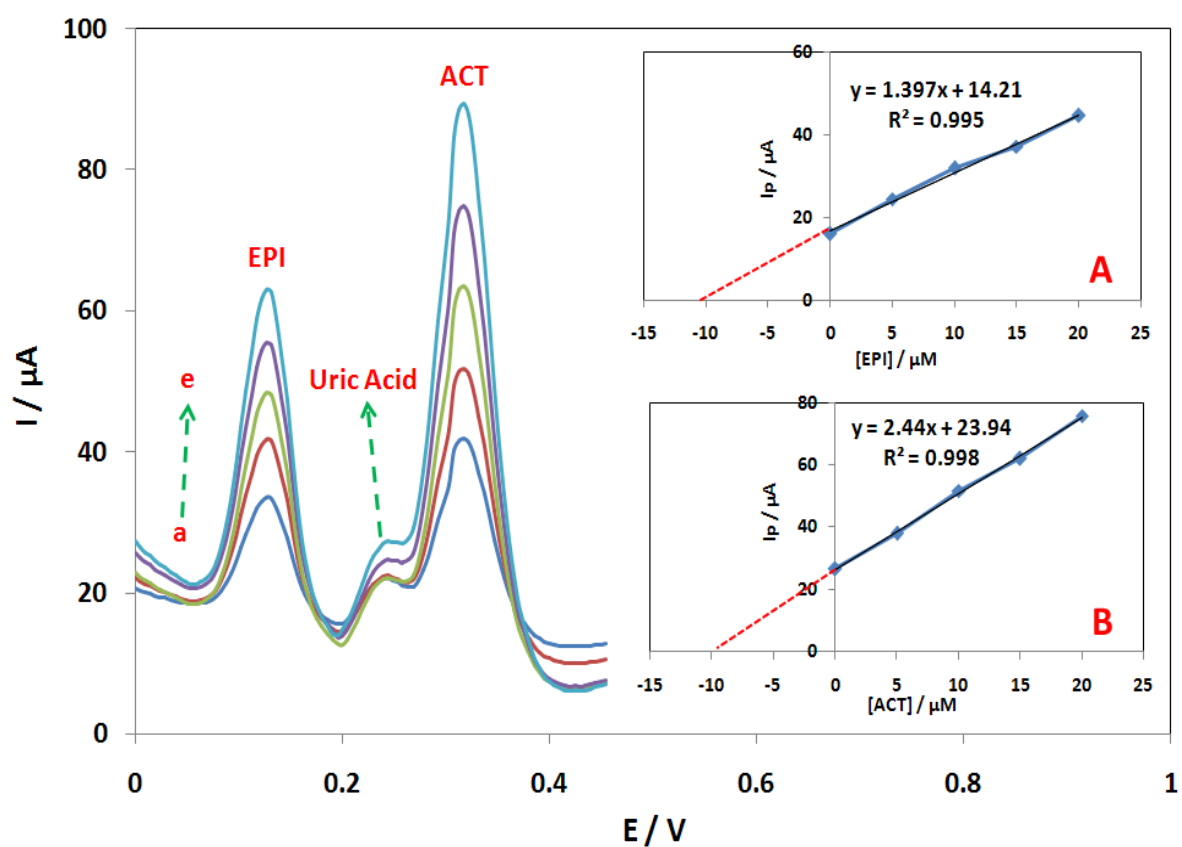

**Fig. S8.** Differential pulse voltammograms of variously spiked concentrations of EPI and ACT mixtures in human blood serum containing 10  $\mu\text{M}$  EPI and 10  $\mu\text{M}$  ACT at the surface of MWCNTs-NHNPs-LDH/GCE: (a) 0+0, (b) 5+5, (c) 10+10, (d) 15+15 and (e) 20+20  $\mu\text{M}$ . Insets: (A) calibration curve of EPI and (B) calibration curve of ACT.



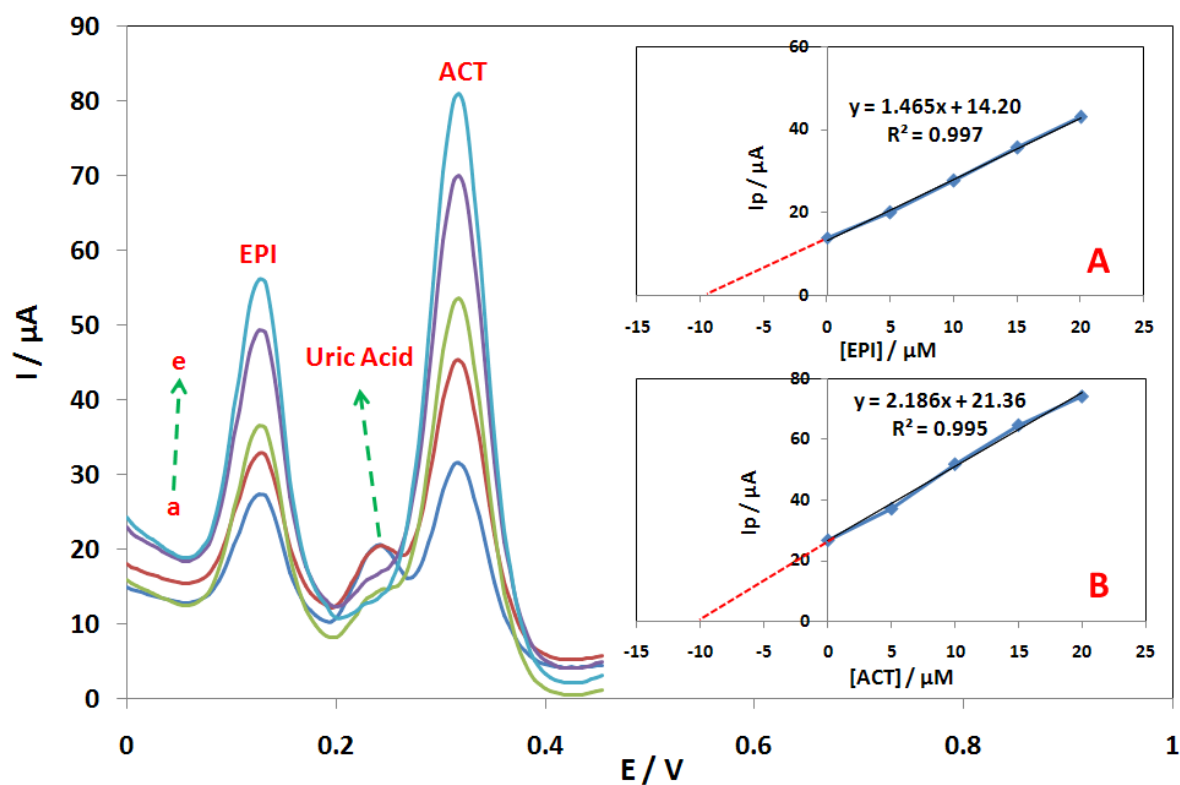

**Fig. S9.** Differential pulse voltammograms of variously spiked concentrations of EPI and ACT mixtures in human urine containing 10  $\mu\text{M}$  EPI and 10  $\mu\text{M}$  ACT at the surface of MWCNTs-NHNPs-LDH/GCE: (a) 0+0, (b) 5+5, (c) 10+10, (d) 15+15 and (e) 20+20  $\mu\text{M}$ . Insets: (A) calibration curve of EPI and (B) calibration curve of ACT.
